# Supplementary material for: Visualization of Miscanthus × giganteus cell wall deconstruction subjected to dilute acid pretreatment for enhanced enzymatic digestibility
Source: PubMed Central journal article supplement (PMC4513789; doi:10.1186/s13068-015-0282-3), 2015-07-25
Supplement: 13068_2015_282_MOESM1_ESM.pdf [file 13068_2015_282_MOESM1_ESM.pdf]

1 **Additional file for**

2 **Visualization of *Miscanthus x giganteus* cell wall deconstruction subjected to dilute acid**  
3 **pretreatment for enhanced enzymatic digestibility**

4 Zhe Ji <sup>1,2</sup>, Xun Zhang <sup>1,2</sup>, Zhe Ling <sup>1,2</sup>, Xia Zhou <sup>1,2</sup>, Shri Ramaswamy <sup>3</sup> and Feng Xu <sup>1,2\*</sup>

5

6 <sup>1</sup> Beijing Key Laboratory of Lignocellulosic Chemistry, Beijing Forestry University, Beijing,  
7 100083, China

8 <sup>2</sup> Ministry of Education Key Laboratory of Wooden Material Science and Application, Beijing  
9 Forestry University, 100083, Tsinghua East Road, Beijing, China

10 <sup>3</sup> Department of Bioproducts and Biosystems Engineering, Kaufert Laboratory, University of  
11 Minnesota, Saint Paul, MN 55108, USA

12 \*Corresponding author. Tel/fax: +86 10 62337993; E-mail address: xfx315@bjfu.edu.cn

13

14

15

16

17

18 **Calculation of Intra-Cell Wall Void Space**

19 Increases in cell wall porosity due to dilute acid pretreatment were quantified by processing  
20 TEM micrographs to threshold intra-wall void spaces into regions from which the size and  
21 shape of voids could be measured. Six regions of interest (ROI) from each of five different  
22 images of the three samples were analyzed to determine void space. To select a threshold that  
23 would distinguish void spaces from intact cell wall regions, the mean and standard deviation of  
24 pixel intensity values within a ROI containing only void space (Figure S3a \*), such as the cell  
25 lumen, were measured. The threshold was then determined as the pixel intensity value which  
26 was two standard deviations above the mean pixel value of the designated void region.  
27 Calculations were based on the following formula:

28 
$$T = \bar{a} + 2\sigma_v$$

29 Where  $T$  is the threshold value, and  $\bar{a}$  and  $\sigma_v$  are respectively mean and standard deviation of  
30 pixel intensity values from a known void region. Examples of measured ROIs and the binary  
31 images determined using this thresholding method are given in Figure S3.

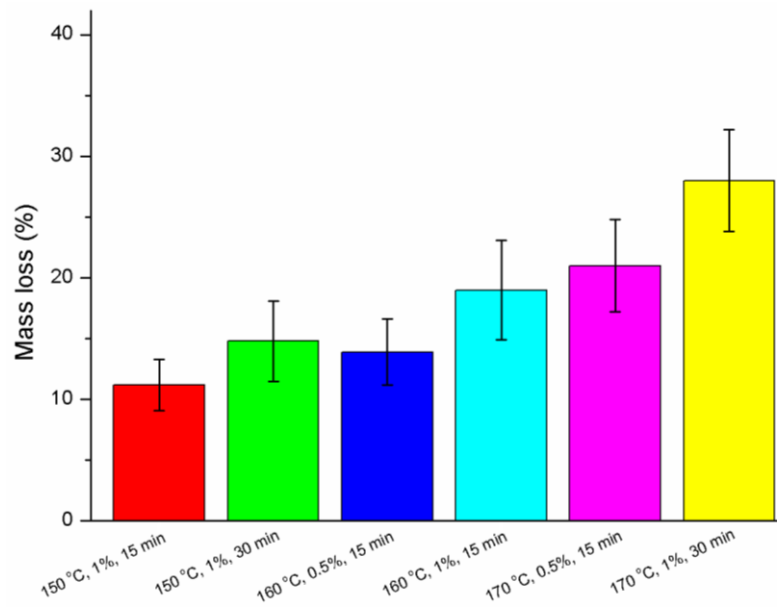

32  
33  
34  
35  
36  
37  
38  
39  
40  
41  
42  
43  
44  
45  
46  
47  
48  
49  
50  
51  
52  
53

**Figure S1 Mass loss of dilute acid pretreated *M. x giganteus* under various conditions.**

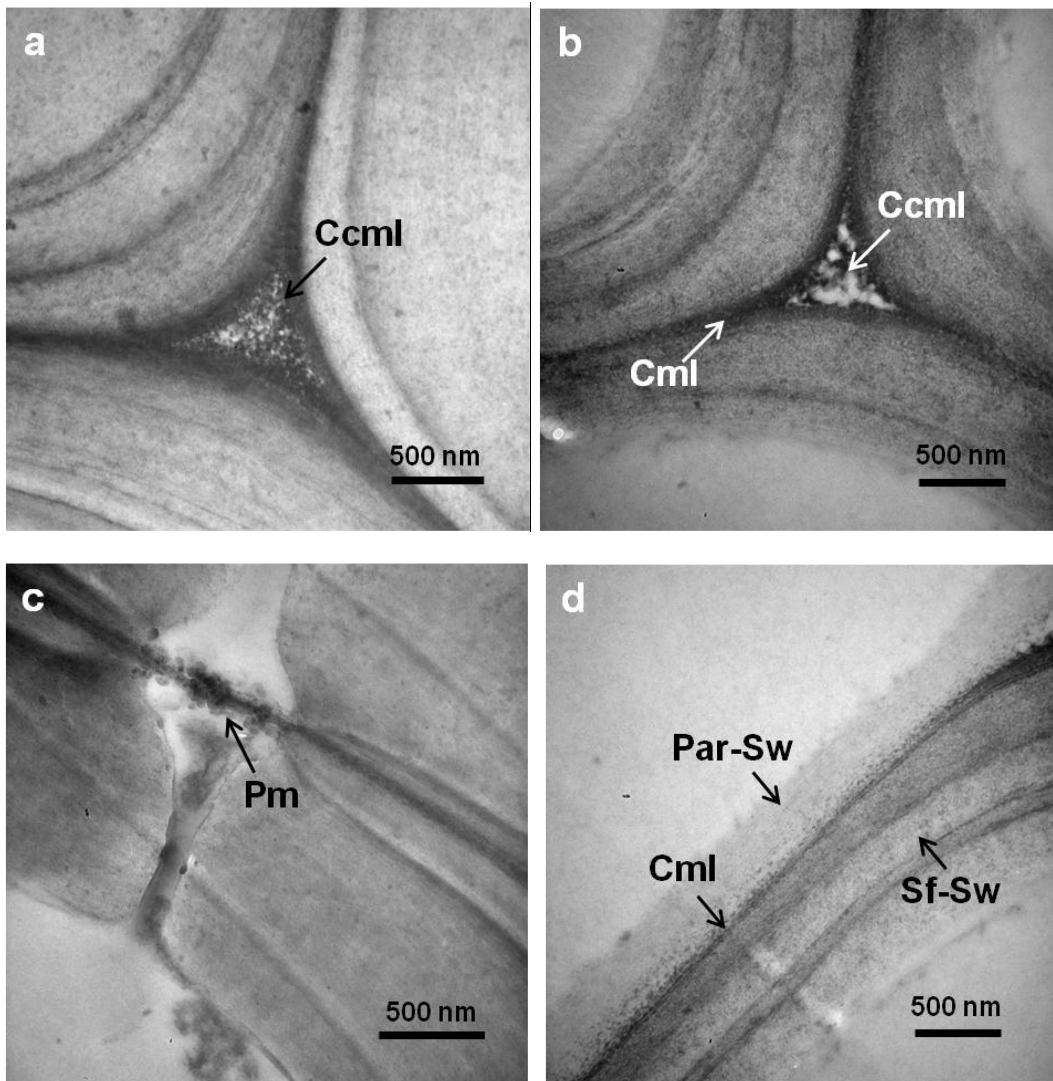

54

55

56 **Figure S2 TEM micrographs of *M. x giganteus* Sf after pretreatment with 1% H<sub>2</sub>SO<sub>4</sub> at**  
 57 **170 °C for 30 min. (a-b)** The Ccml regions were visibly absent and aggregation of droplets  
 58 were seen to migrate from the Ccml to the adjacent Cml; **(c)** some dark globular and irregular  
 59 formations were accumulated in the thin Pm. **(d)** at the shared Cml the droplets preferentially  
 60 diffused into the Sw of Par compared to the more lignified Sf. Ccml, compound cell corner;  
 61 Cml, compound middle lamella; Sw, secondary wall; Pm, pit membrane.

62

63

64

65

66

67

68

69

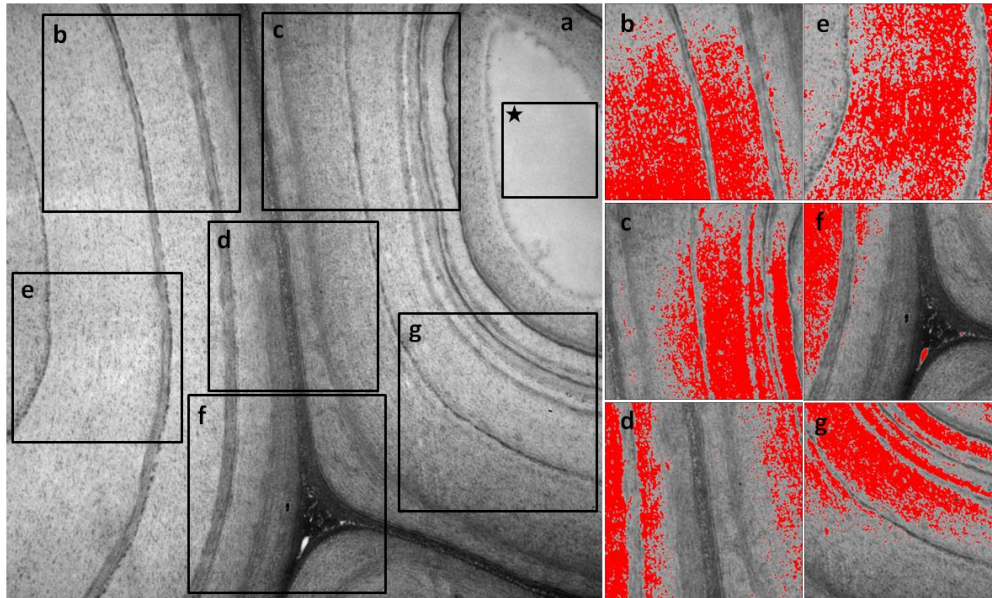

70  
71 **Figure S3 Explanation of void space calculation.** (a) Original TEM image of dilute acid  
72 treated Sf of *M. x giganteus*. The ROI denoted with asterisk designates the known void region  
73 from which the threshold value was calculated; (b-g) examples of intra-cell wall ROIs selected  
74 from the original image. The right panels show the effect of applying the calculated threshold  
75 to the ROIs and the resulting void space values (shown in red).

76  
77  
78  
79  
80  
81  
82  
83  
84  
85  
86  
87  
88  
89  
90  
91  
92

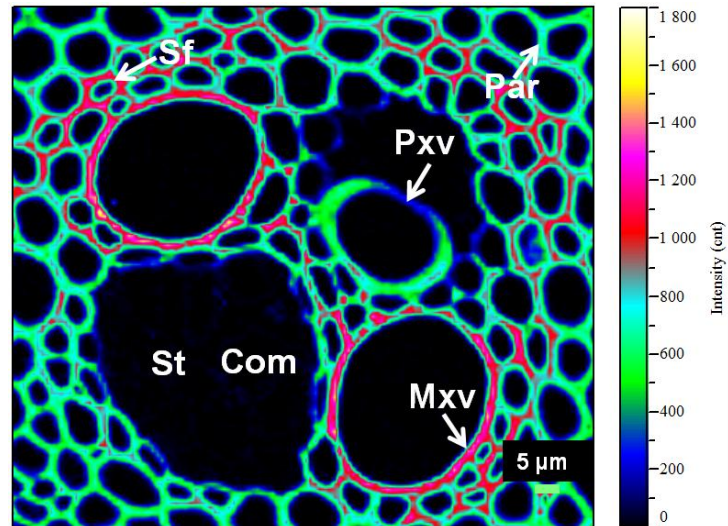

93  
 94 **Figure S4 Raman image of lignin distribution in treated *M. x giganteus* at 170 °C, 1%**  
 95 **H<sub>2</sub>SO<sub>4</sub> for 30 min calculated by integrating over the spectral range from 1575 to 1620 cm<sup>-1</sup>.**  
 96 It showed the distribution of lignin with decreased brightness compared to the native sample,  
 97 indicating lignin removal upon dilute acid pretreatment. Sf, sclerenchyma fibers; Par,  
 98 parenchyma; P xv, protoxylem vessel; M xv, metaxylem vessel; St, sieve tube; Com, companion  
 99 cell.

100
